# Supplementary material for: Tetraedron minimum, First Reported Member of Hydrodictyaceae to Accumulate Secondary Carotenoids
Source: PubMed Central journal article supplement (PMC7911234; doi:10.3390/life11020107), 2021-01-30
Supplement: life-11-00107-s001.pdf [file life-11-00107-s001.pdf]

Supplementary Information

# *Tetraedron minimum*, First Reported Member of Hydrodictyaceae to Accumulate Secondary Carotenoids

Philipp Doppler, Christoph Kornpointner, Heidi Halbwirth, Daniel Remias and Oliver Spadiut

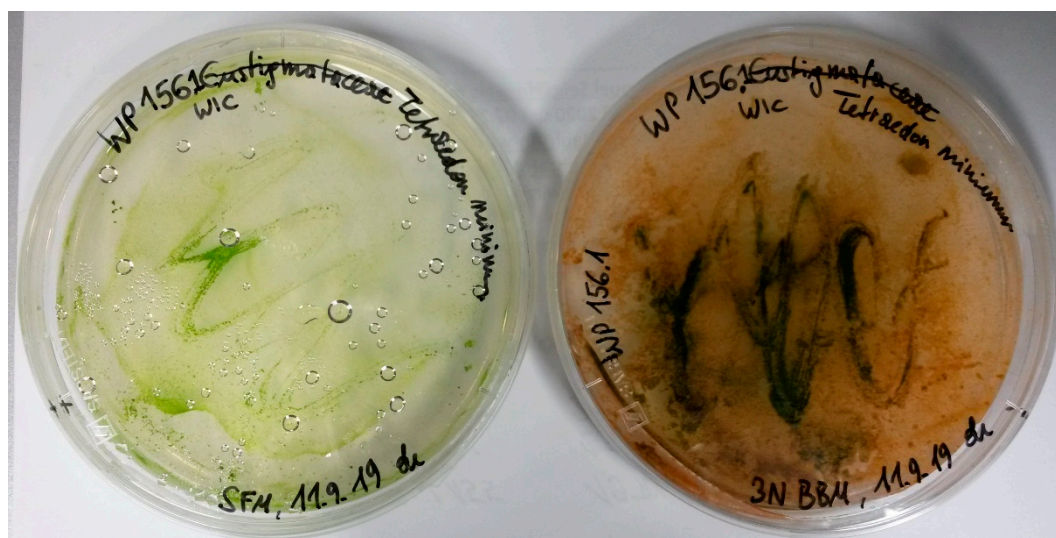

**Figure S1.** *T. minimum* growing on SFM (left, stayed green) and 3N-BBM plate (right, turned red-dish). Picture was taken 8 months after inoculation.

**Table S1.** Electrical Conductivity of media prepared for pre-experiments with varying NaCl levels.

| Medium   | NaCl added (mM) | El. Conductivity ( $\mu\text{S}\cdot\text{cm}^{-1}$ ) | NaCl Equiv. (mM) |
|----------|-----------------|-------------------------------------------------------|------------------|
| BBM      | 0               | 883                                                   | 6.3              |
|          | 10              | 2043                                                  | 17.1             |
|          | 30              | 4669                                                  | 41.8             |
| 0.3N-BBM | 0               | 622                                                   | 3.9              |
|          | 10              | 1841                                                  | 15.2             |
|          | 30              | 4185                                                  | 37.2             |
| SFM      | 0               | 499                                                   | 2.8              |
|          | 10              | 1668                                                  | 13.6             |
|          | 30              | 3960                                                  | 35.0             |

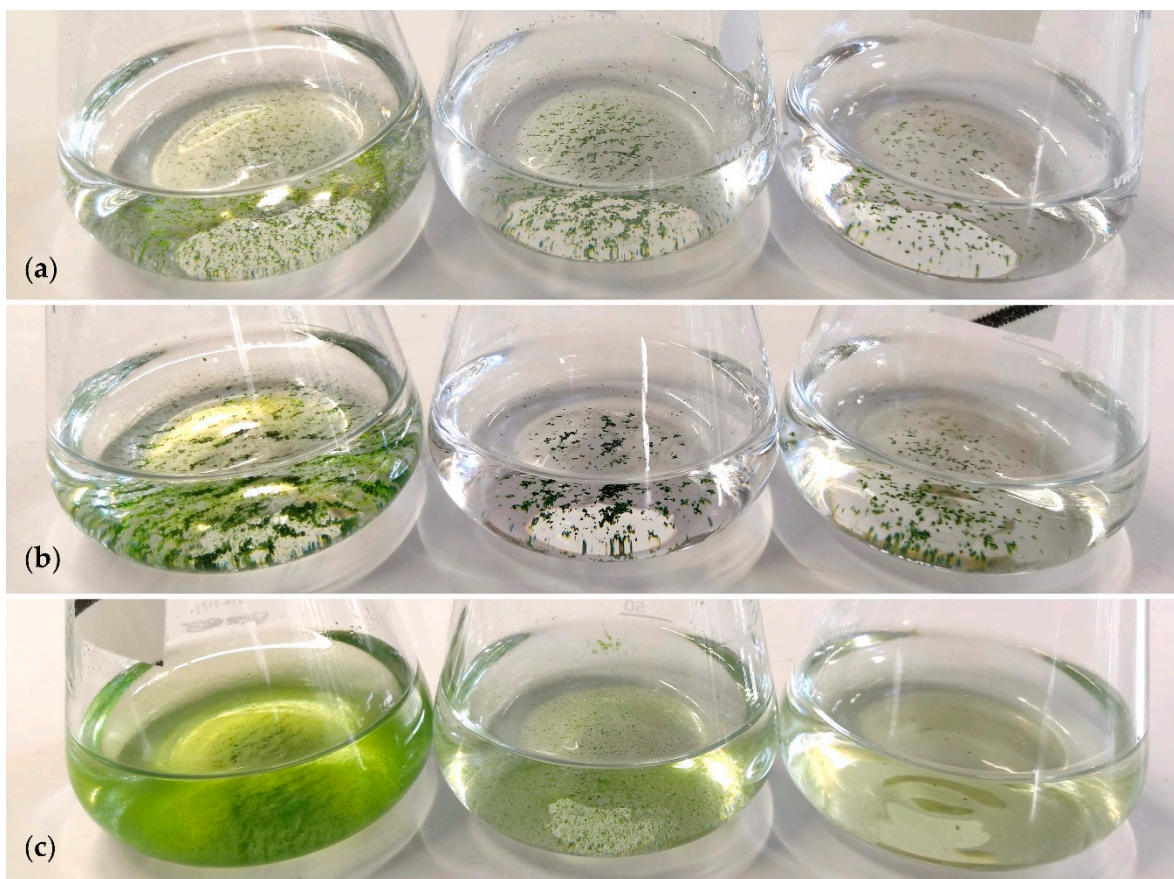

**Figure S2.** Growth experiments of *T. minimum* in Erlenmeyer flasks with three different media (a) BBM (b) 0.3N-BBM (c) SFM are shown with additional NaCl at concentrations of 0, 10 and 30 mM (from left to right). Pictures were taken 30 days after inoculation.

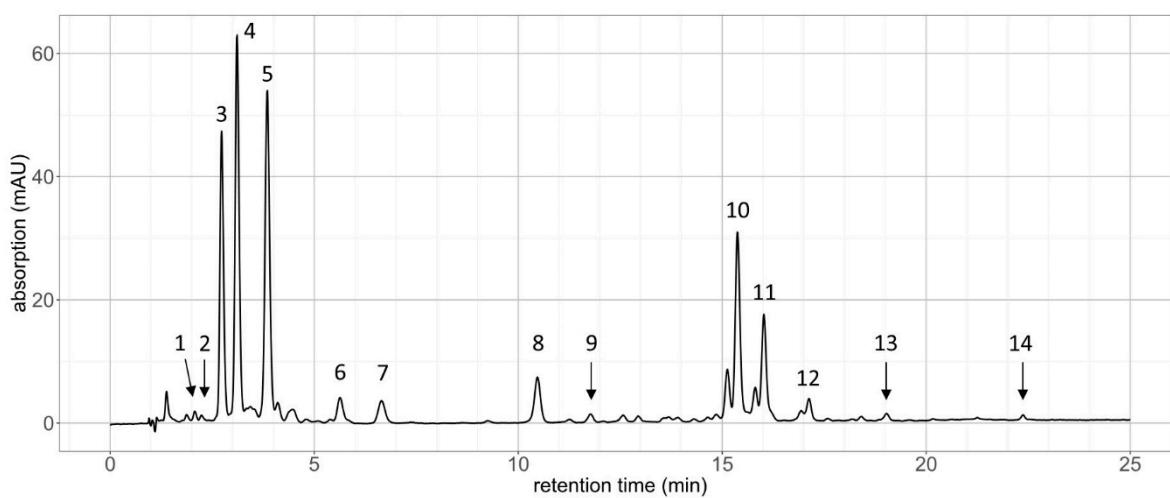

**Figure S3.** DAD-chromatogram at 450 nm of HPLC-MS analysis of an orange-colored *T. minimum* extract. Peak assignments are shown in Table S2.

Table S2. Identified pigments by HPLC-MS in the *T. minimum* extract.

|    | Retention<br>(min) | Assigned<br>Substance | Detected Mass<br>(M+H) <sup>+</sup> | Theoretical<br>Mass (M+H) <sup>+</sup> | Mass Error<br>(ppm) |
|----|--------------------|-----------------------|-------------------------------------|----------------------------------------|---------------------|
| 1  | 2.1                | neoxanthin            | 601.4233                            | 601.4251                               | 3.0                 |
| 2  | 2.2                | violaxanthin          | 601.4229                            | 601.4251                               | 3.7                 |
| 3  | 2.7                | astaxanthin           | 597.3936                            | 597.3938                               | 0.3                 |
| 4  | 3.1                | adonixanthin          | 583.4124                            | 583.4146                               | 3.8                 |
| 5  | 3.9                | lutein + zeaxanthin * | 569.4345                            | 569.4353                               | 1.4                 |
| 6  | 5.7                | canthaxanthin         | 565.4039                            | 565.4040                               | 0.2                 |
| 7  | 6.7                | chlorophyll <i>b</i>  | 907.5202                            | 907.5219                               | 1.9                 |
| 8  | 10.5               | chlorophyll <i>a</i>  | 893.5401                            | 893.5426                               | 2.8                 |
| 9  | 11.8               | echinenone            | 551.4238                            | 551.4247                               | 1.6                 |
| 10 | 15.4               | astaxanthin ME        |                                     |                                        |                     |
| 11 | 16.0               | adonixanthin ME       |                                     |                                        |                     |
| 12 | 17.1               | astaxanthin ME        |                                     |                                        |                     |
| 13 | 19.0               | β-carotene            | 537.4416                            | 537.4455                               | 7.3                 |
| 14 | 22.4               | astaxanthin DE        |                                     |                                        |                     |

\* co-eluting isomers, ME = monoester, DE = diester
